# Supplementary material for: One-pot one-cluster synthesis of fluorescent and bio-compatible Ag14 nanoclusters for cancer cell imaging
Source: Royal Society of Chemistry journal article supplement (doi:10.1039/c5nr06421j), 2015-01-01
Supplement: c5nr06421j1.pdf [file c5nr06421j1.pdf]

Copyright WILEY-VCH Verlag GmbH & Co. KGaA, 69469 Weinheim, Germany, 2015.

## Supporting Information

### **One-pot one-cluster synthesis of fluorescent and bio-compatible Ag<sub>14</sub> nanoclusters for cancer cell imaging**

*Jie Yang, Nan Xia, Xinan Wang, Xianhu Liu, An Xu, Zhikun Wu\*, Zhixun Luo\**

#### **1. Chemicals**

Silver nitrate (AgNO<sub>3</sub>, 99.8% metals basis, AR), Sodium borohydride (NaBH<sub>4</sub>, 98% metals basis, Aladdin), Methanol (≥99.5%, AR, SCR), Sodium hydroxide (NaOH, ≥96.0%, AR, SCR), L-Reduced Glutathione (GSH, ≥98.0%, SIGMA-ALDRICH), Ethanol (≥99.7%, AR, SCR), Butyl alcohol (≥99.5%, AR, SY), *n*-Propanol (≥99.0%, AR, SCR), Hexadecyl trimethyl ammonium Bromide (CTAB, ≥99.0%, AR, SCR), F12 medium (Hyclone), Fetal calf serum (Biowest), Paraformaldehyde (≥94%, AR), Lung cancer cell A549 (ATCC). The CdTe/ZnTe and CdSe quantum dots are from CHINA BEIJING BEIDA JUBANG SCIENCE & TECHNOLOGY CO., Ltd. All chemicals were used as received without any pretreatment.

Nanopure water (resistivity 18.2 MΩ·cm) was purified by a Milli-Q (Millipore Co.) ultra-pure water system. All glass containers and stir bars were thoroughly cleaned with aqua regia (HCl:HNO<sub>3</sub> = 3:1 vol), rinsed with an abundant amount of Nanopure water, ultrasonic clean for several minutes, and then dried in an oven prior to use.

#### **2. Synthesis of Ag Clusters (or nanoparticles or complexes)**

**Ag<sub>14</sub>(SG)<sub>11</sub> Clusters:** The synthetic method was referred to our previous work.<sup>1</sup> First, the silver salt (AgNO<sub>3</sub>, 0.0849 g, 0.5 mmol) was dissolved in 25 ml water; the solution was kept at ~0°C in an ice bath, and the magnetic stirring speed was ~1200 rpm. Then the thiol ligand (GSH, 0.615 g, 2 mM) was added to the cold Ag solution to form the silver-GSH precursor. The pH value of the reaction solution was adjusted to ~7 (using 0.095 g sodium hydroxide solid and ~300 μl 0.5 M NaOH aqueous solution) until the white precipitate completely disappeared. To this clear solution, 5 ml of ice-cold aqueous NaBH<sub>4</sub> (0.189 g, 5 mM) were slowly added dropwise under vigorous stirring. After ageing for over 7 hours, the clusters



were precipitated with methanol. The collected solid can be further purified by recrystallization from MeOH/H<sub>2</sub>O solution.

**8nm Ag nanoparticles:** First, the silver salt (AgNO<sub>3</sub>, 0.0849 g, 0.5 mM) was dissolved in 25 ml water; the solution was kept at room temperature, and the magnetic stirring speed was ~1200 rpm. Then the thiol ligand (GSH, 0.1538 g, 0.5 mM) was added to the Ag solution to form the silver-GSH precursor. To this solution, 5 ml of aqueous NaBH<sub>4</sub> (0.189 g, 5 mM) were slowly added dropwise under vigorous stirring. After ageing for over 2 hours, the clusters were precipitated with methanol. The collected solid can be further purified by recrystallization from MeOH/H<sub>2</sub>O solution. For the UV-Vis and TEM characterization, see **Figure S15**. The Ag/S atomic ratio revealed by quantitative XPS measurement is 3.0:1.

**Ag-GSH complexes:** First, the silver salt (AgNO<sub>3</sub>, 0.0849 g, 0.5 mM) was dissolved in 25 ml water; the solution was kept at ~0°C in an ice bath, and the magnetic stirring speed was ~1200 rpm. Then the thiol ligand (GSH, 0.615 g, 2 mM) was added to the cold Ag solution to form the silver-GSH precursor. The pH value of the reaction solution was adjusted to ~7 (using 0.095 g sodium hydroxide solid and ~300 µl 0.5 M NaOH aqueous solution) until the white precipitate completely disappeared. The complexes were precipitated with methanol. The Ag/S atomic ratio revealed by quantitative XPS measurement is 0.80:1.

### 3. Cell-imaging

For cell imaging, lung cancer cells (A549) were cultured in F12 medium with 10% fetal calf serum at 37 °C under 5% CO<sub>2</sub>. 100 µg/mL clusters dispersion was added to the cells and allowed to incubate for 24h. The unbound clusters were washed away with PBS and cell samples were fixed with 2% paraformaldehyde solution.

### 4. Characterization Methods

(1) *UV-Vis spectroscopy:* UV-Vis absorption spectra of Ag nanoclusters in water were recorded in standard quartz cuvette using a UV2550 ultraviolet and visible spectrophotometer (Shimadzu, Japan).

(2) *Polyacrylamide gel electrophoresis (PAGE):* The PAGE experiments of Ag clusters were conducted at ambient temperature, using homemade polyacrylamide gels with various concentration, in tris(hydroxymethyl)aminomethane base buffer of a pH~8.



(3) *Mass Spectrometry (ESI-MS)*: ESI-MS analysis was conducted on the Waters Xevo G2-S Qtof. The sample was dissolved in pure water with a final concentration of 10 mg/ml. The spray voltage was set at 2.0 kV and the cone voltage was set at 20 V. The cone gas flow rate was set at 50 L/h and the desolvation gas flow rate was set to 800 L/h. The source temperature was set at 100 °C and the desolvation temperature was set at 350 °C.

(4) *Nuclear magnetic resonance (NMR)*: The NMR spectrum analysis was obtained on an AVANCE AV 400 (Bruker, Switzerland) spectrometer.

(5) *X-ray photoelectron spectroscopy (XPS)*: XPS analysis was conducted on a VG ESCALAB-MK photoelectron spectrometer with a Mg K $\alpha$  source. All binding energies were calibrated using the C(1 s) carbon peak (284.8 eV).

(6) *Transmission electron microscopy (TEM)*: TEM images of Ag<sub>14</sub>(SG)<sub>11</sub> clusters were obtained on JEOL2010 at 200 keV.

(7) *Fluorescence spectroscopy*: Fluorescence analysis was performed on FluoroMax-4 spectrofluorometer (HORIBA Jobin Yvon, France).

(8) *Fluorescence lifetimes*: Lifetime measurement was determined using a picoseconds time-resolved fluorescence apparatus. The excitation laser pulses was supplied by an optical parametric amplifier (OPA-800CF, Spectra Physics), and it was pumped by a regenerative amplifier (Spitfire, Spectra Physics). The excitation pulse energy was ~100 nJ/pulse and the repetition rate was 1 KHz which focused onto a spot of 0.5 mm (diameter). The photoluminescence collected with the 90° geometry was dispersed by a polychromator (250is, Chromex) and a photon-counting type streak camera (C5680, Hamamatsu Photonics) was used for collection. The data detected by digital camera (C4742-95, Hamamatsu) and analyzed with HPDTA software. The temporal resolution was 2-100 ps and the spectral resolution was 2 nm. The nonlinear least-square fitting was used for analysis the kinetic traces from time-resolved spectra to a general sum-of-exponentials function after deconvolution of instrument response function. All of the analyses were carried out at room temperature.

(9) *Laser scanning confocal microscopy (LSCM)*: The cells were scanned in bright field and excited at 405/488 nm using laser scanning confocal ZEISS LSM710.

(10) *Fluorescence microscope*: Olympus BX60.

## 5. Supporting Figures S1-15

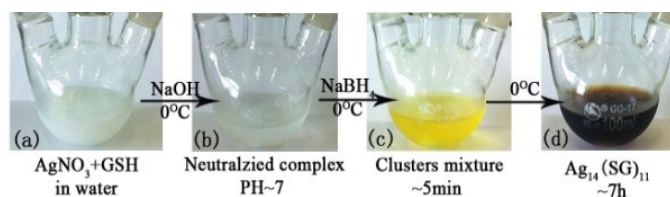

**Figure S1.** Color evolution during the synthesis of Ag<sub>14</sub> clusters. (a) the initial AgNO<sub>3</sub>-GSH complex; (b) the suspension turns to clear after the pH value was adjusted to ~7; (c) 5 min. after addition of NaBH<sub>4</sub>; (d) 7h. after addition of NaBH<sub>4</sub>.

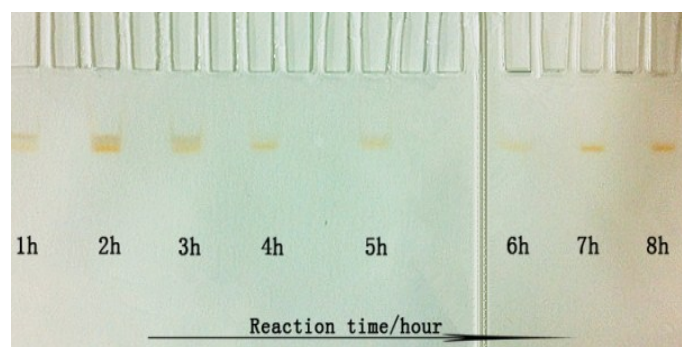

**Figure S2.** PAGE evolution with the prolonging of reaction time from 1h to 8h (recorded per hour). It indicates the product is of high purity even without any purification after 7 hours' ageing.

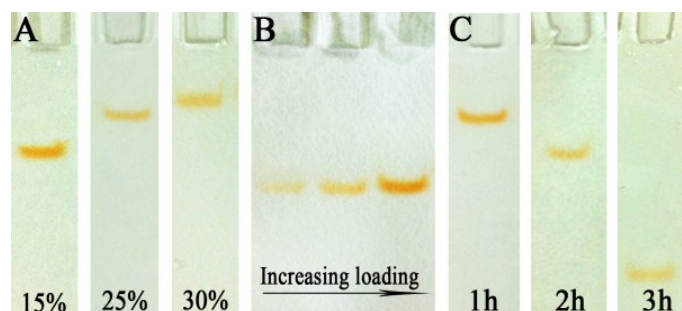

**Figure S3.** PAGE analysis of the purified Ag<sub>14</sub> clusters in different conditions: (A) acrylamide gels with different monomer concentrations; (B) with increasing loading amount of Ag clusters from left to right; (C) different running time.

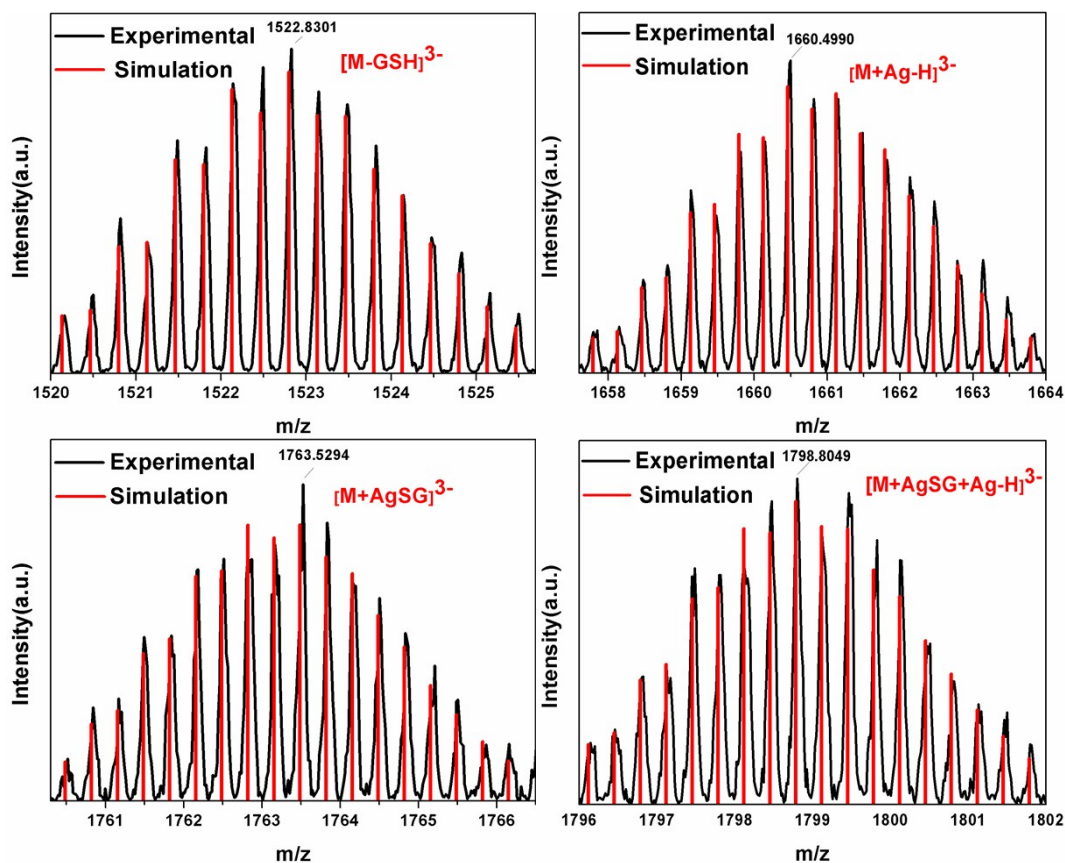

**Figure S4.** Isotope peaks of the  $[M-GSH]^{3-}$  at 1522.8301 (deviation 0.0329), the  $[M+Ag-H]^{3-}$  at 1660.4990 (deviation 0.0415), the  $[M+AgSG]^{3-}$  at 1763.5294 (deviation 0.0438) and the  $[M+AgSG+Ag-H]^{3-}$  at 1798.8049 (deviation 0.0202). Note:  $M = [Ag_{14}(SG)_{11}-4H]$ .

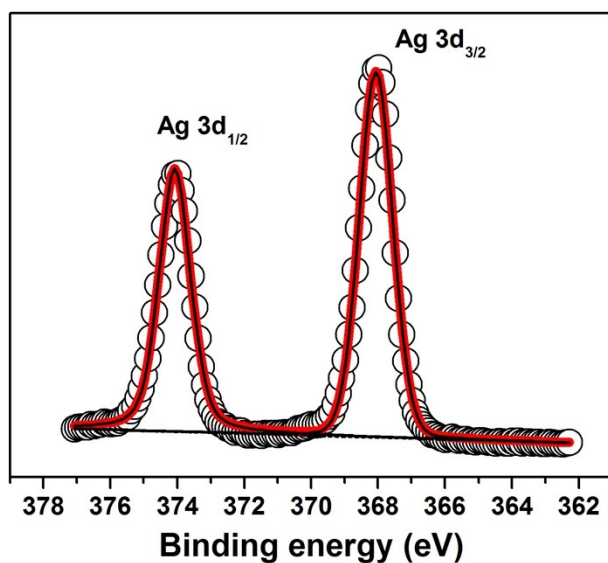

**Figure S5.** XPS high-resolution scan of  $Ag_{14}$  nanoclusters in the Ag 3d region.

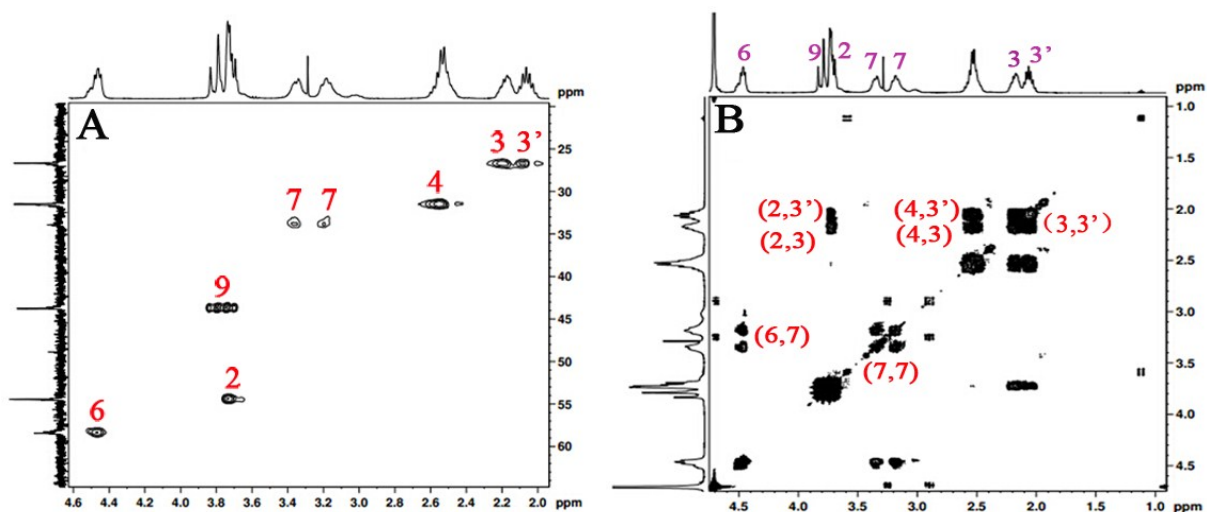

**Figure S6.** 2D NMR spectra of  $\text{Ag}_{14}(\text{SG})_{11}$  clusters. (A) Edited mode HSQC spectrum (B) COSY spectrum. Solvent:  $\text{D}_2\text{O}$ .

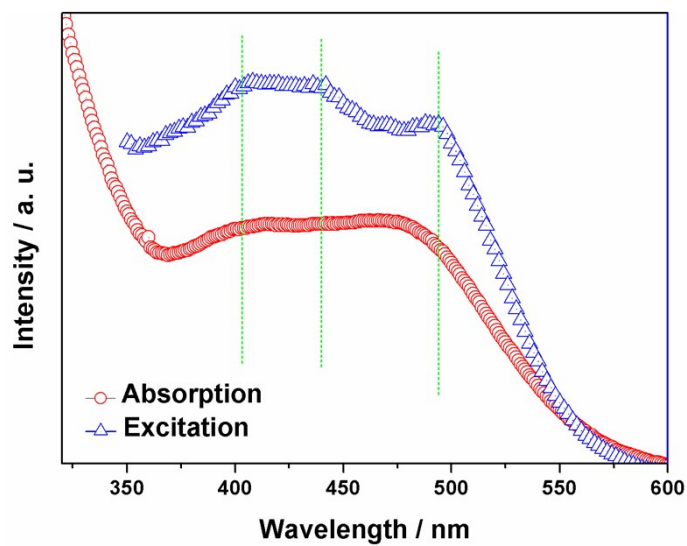

**Figure S7.** Absorption and excitation (monitored at 640 nm) spectra of  $\text{Ag}_{14}$ .



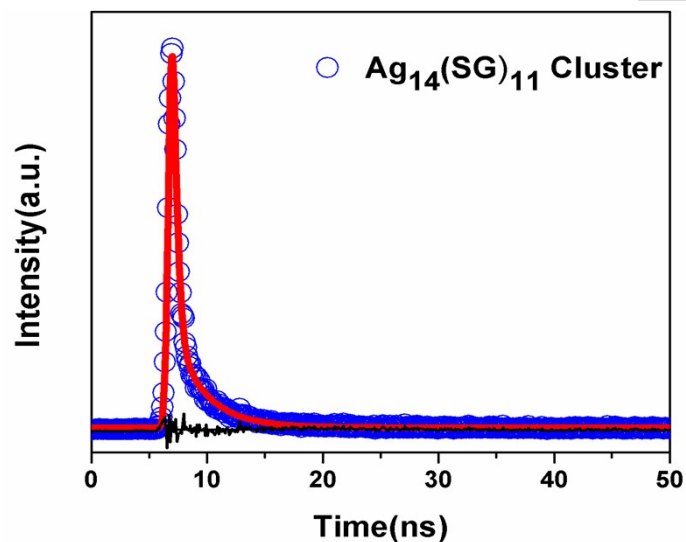

**Figure S8.** Lifetime measurement of the  $\text{Ag}_{14}$  clusters.

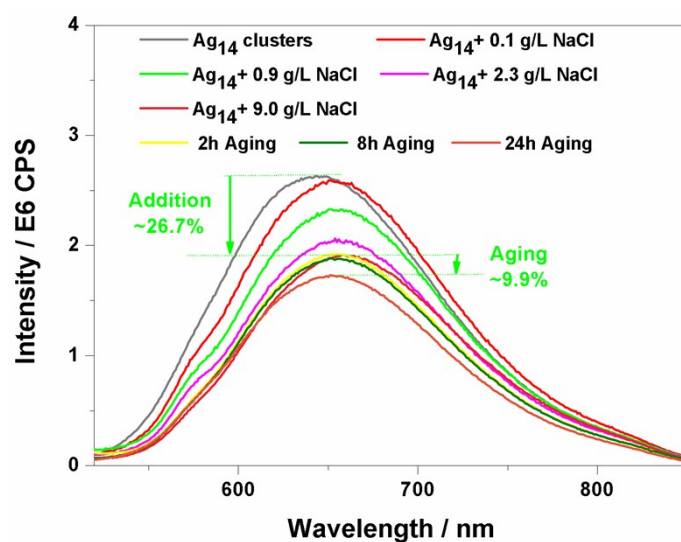

**Figure S9.** Fluorescence of  $\text{Ag}_{14}$  in presence of variously concentrated NaCl (0.1 g/L, 0.9 g/L, 2.3 g/L and 9.0 g/L). When the concentration was fixed at 9.0 g/L, the fluorescence was investigated after aging different time (2, 8, 24 hours); while in other cases, the fluorescence was measured immediately after the salt was added.

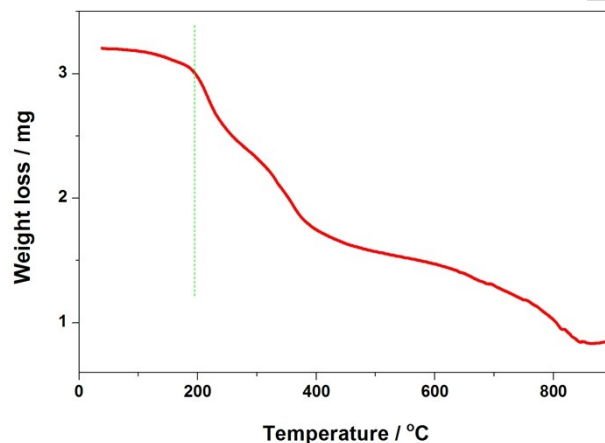

**Figure S10.** The TGA of  $\text{Ag}_{14}$ .

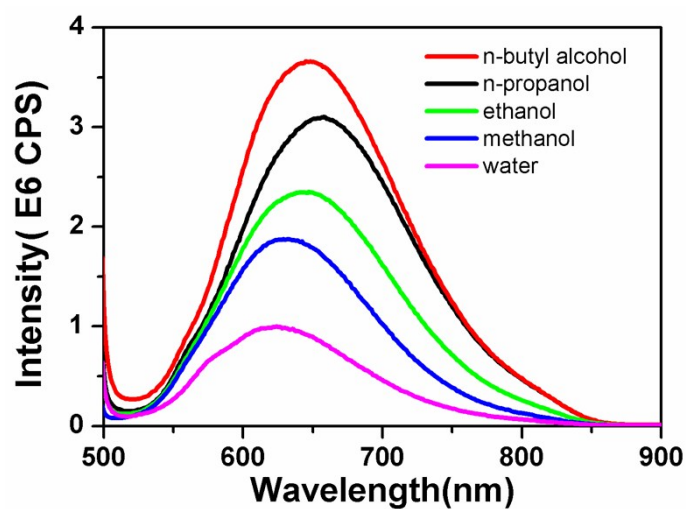

**Figure S11.** Solvent-dependent fluorescence of  $\text{Ag}_{14}$ .

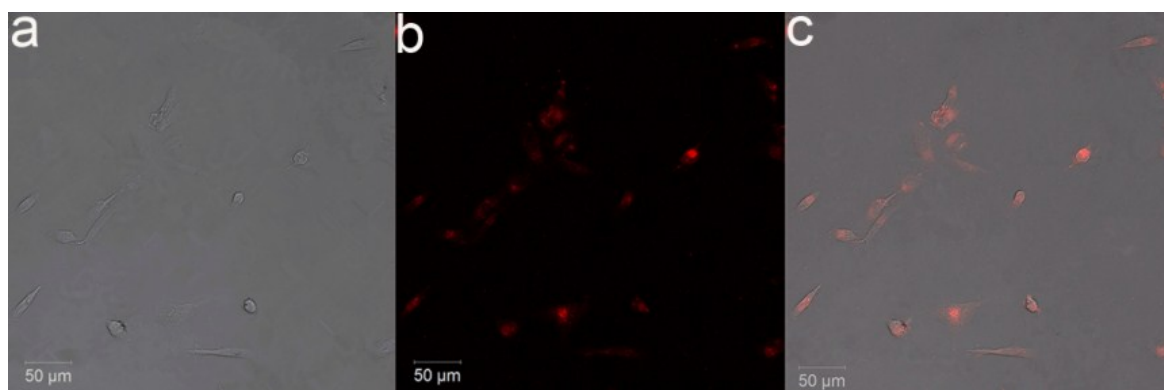

**Figure S12.** (a) The bright-field image of lung cancer cells incubated with  $\text{Ag}_{14}(\text{SG})_{11}$  clusters for 24h; (b) TPF image (false color) of lung cancer cells incubated with  $\text{Ag}_{14}(\text{SG})_{11}$  clusters upon excitation at 405/488 nm; (c) The overlaid picture of corresponding bright-field image (a) and the TPF (b).



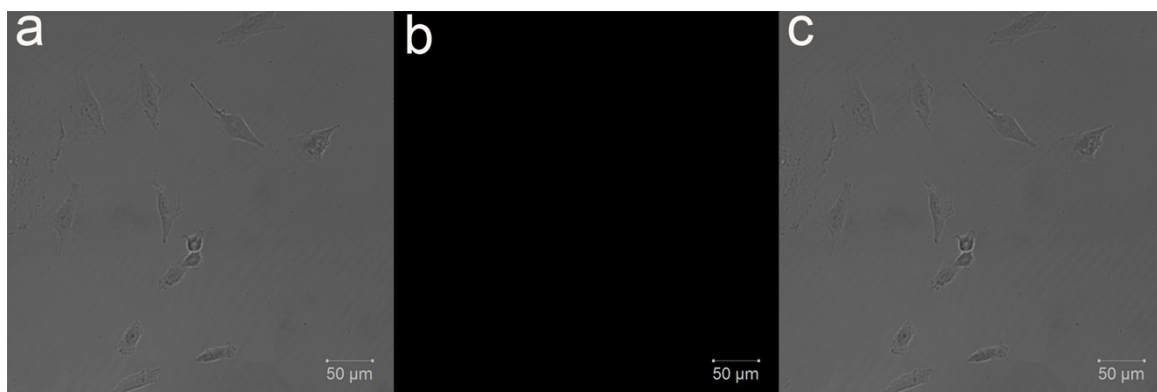

**Figure S13.** (a) Bright-field image of A549 cells; (b) TPF image of lung cancer cells upon excitation at 405/488nm; (c) Overlay of (a) and (b).

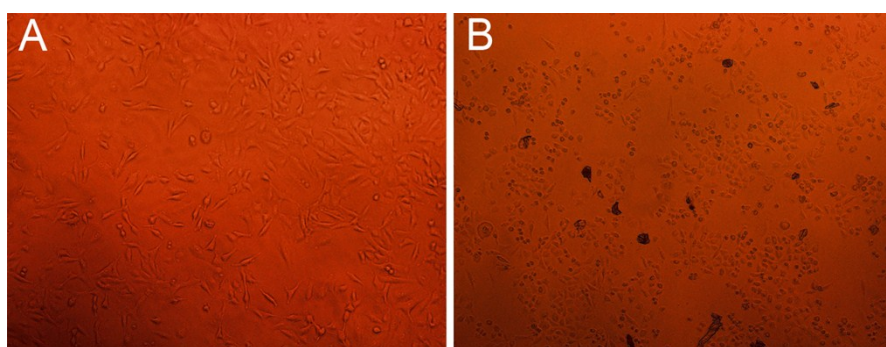

**Figure S14.** Fluorescence microscope images (false color) of A549 cells and A(L) cells incubated with Ag<sub>14</sub> for 24h.

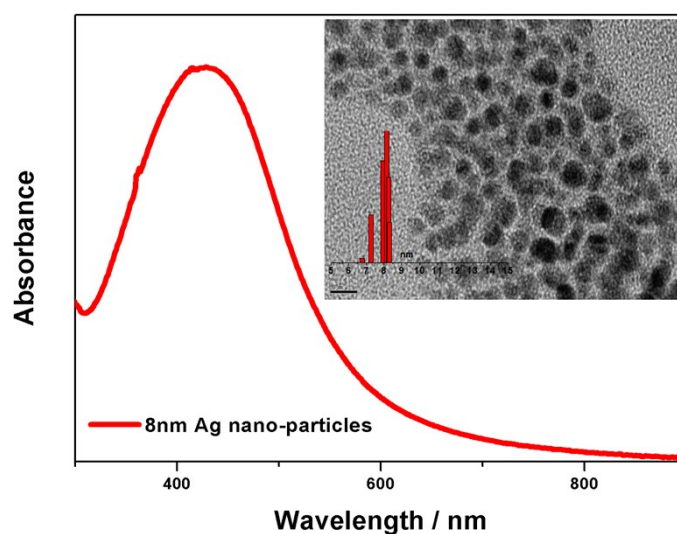

**Figure S15.** UV-Vis absorption spectrum of 8nm silver nanoparticles. Inset: TEM image of Ag clusters. The scale bar is 10 nm and the statistical size of nanoparticles is 8.03, ~8nm

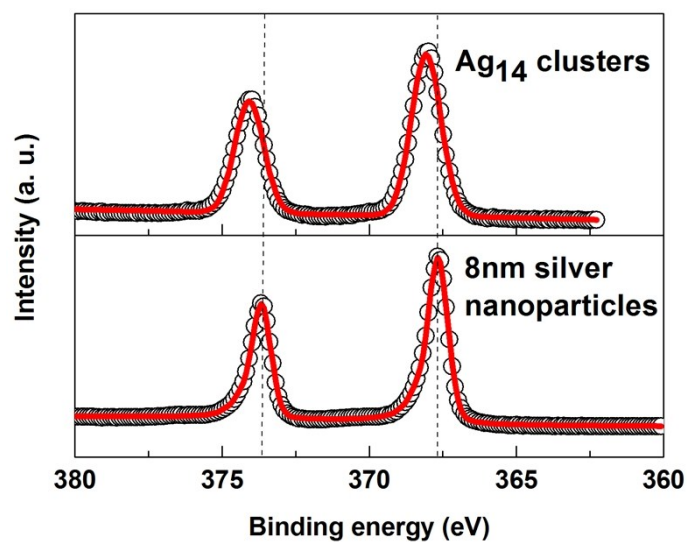

**Figure S16.** Comparison of Ag<sub>3d</sub> binding energies of the Ag<sub>14</sub> and 8nm nanoparticles.

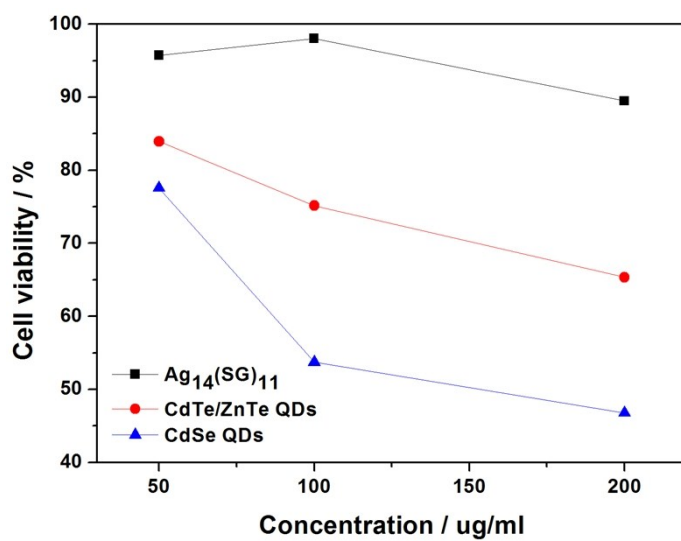

**Figure S17.** Viability of A549 cells in variously concentrated (50, 100, 200 ug/ml) Ag<sub>14</sub> (black), CdTe/ZnTe QDs (red) and CdSe QDs (blue).

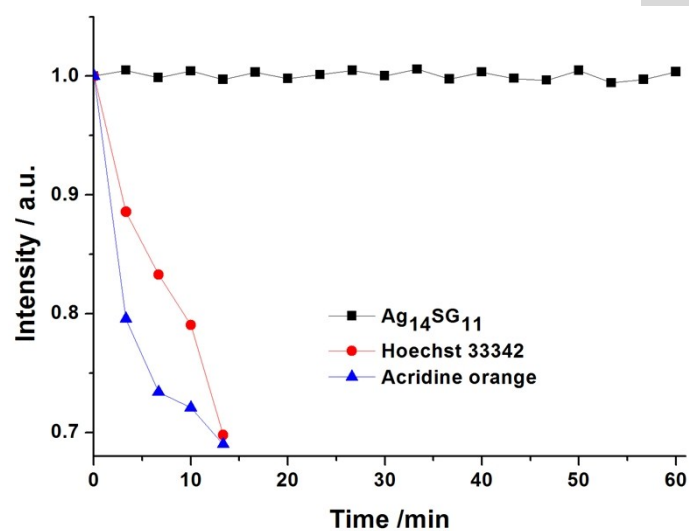

**Figure S18.** Photobleaching curves of Ag<sub>14</sub> nanoclusters (black), Hoechst 33342 (red) and Acridine orange (blue).

#### Reference

(1) Wu, Z.; Lanni, E.; Chen, W.; Bier, M. E.; Ly, D.; Jin, R. *J. Am. Chem. Soc.* **2009**, *131*, 16672-16674.
